# Supplementary material for: Dynamics and Mechanisms in the Recruitment and Transference of Histone Chaperone CIA/ASF1
Source: PubMed Central journal article supplement (PMC6651421; doi:10.3390/ijms20133325), 2019-07-06
Supplement: ijms-20-03325-s001.pdf [file ijms-20-03325-s001.pdf]

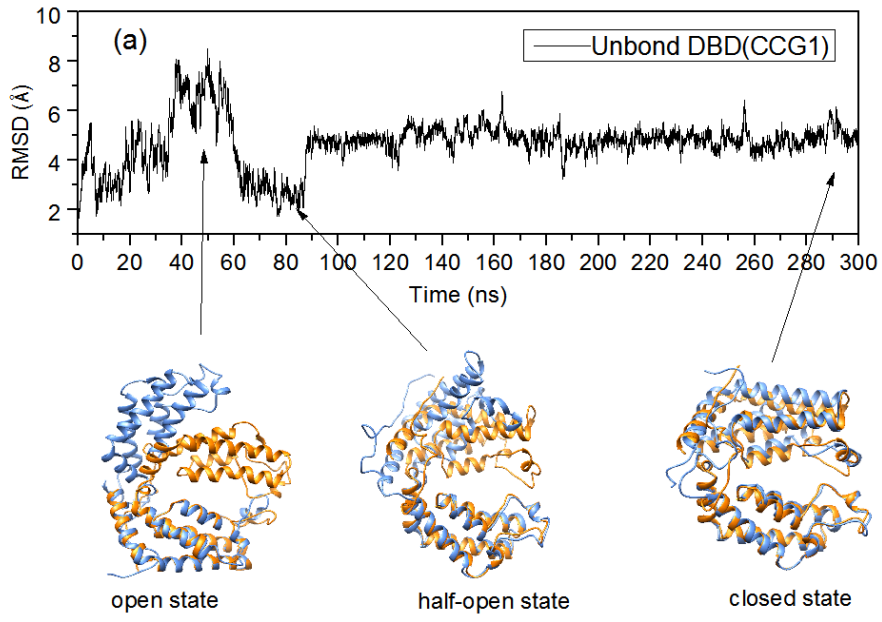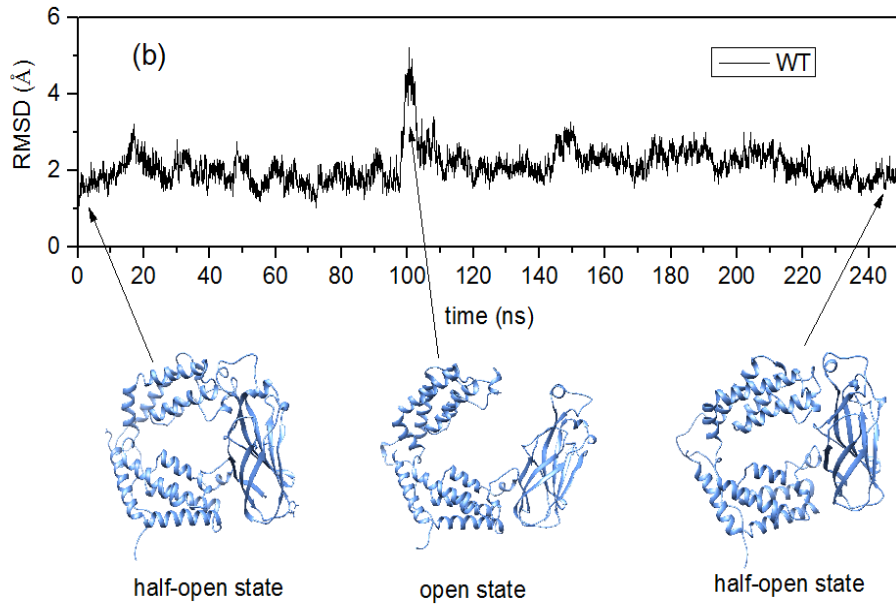

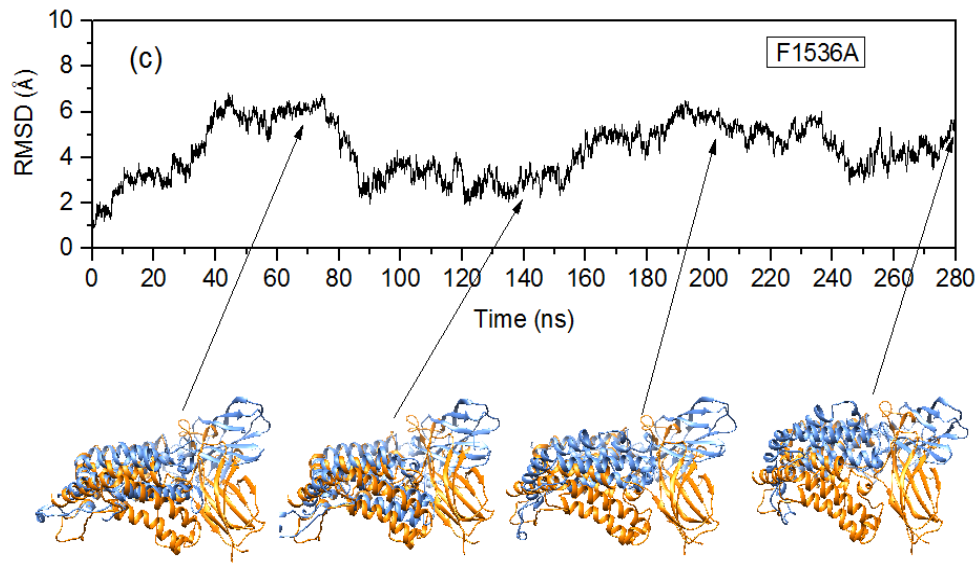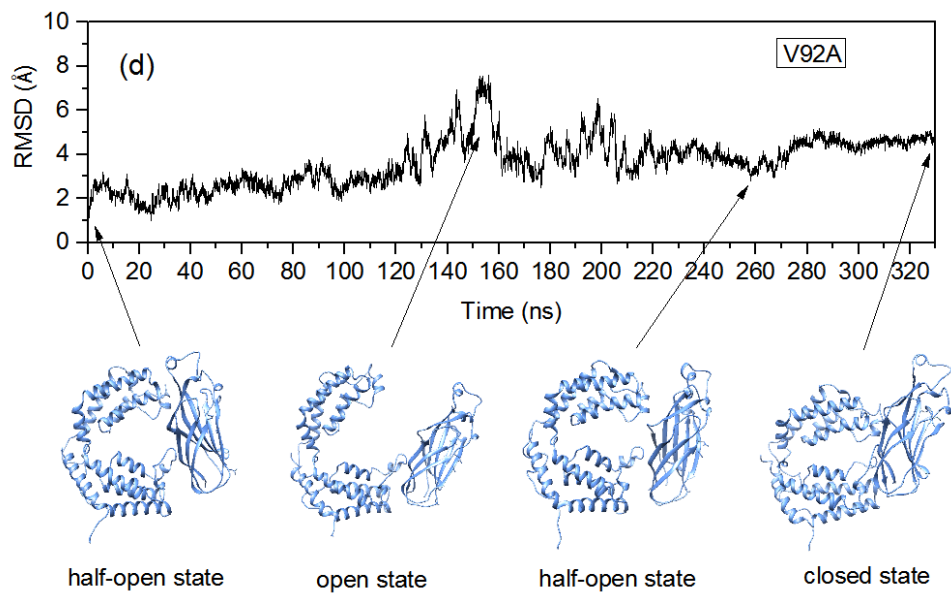

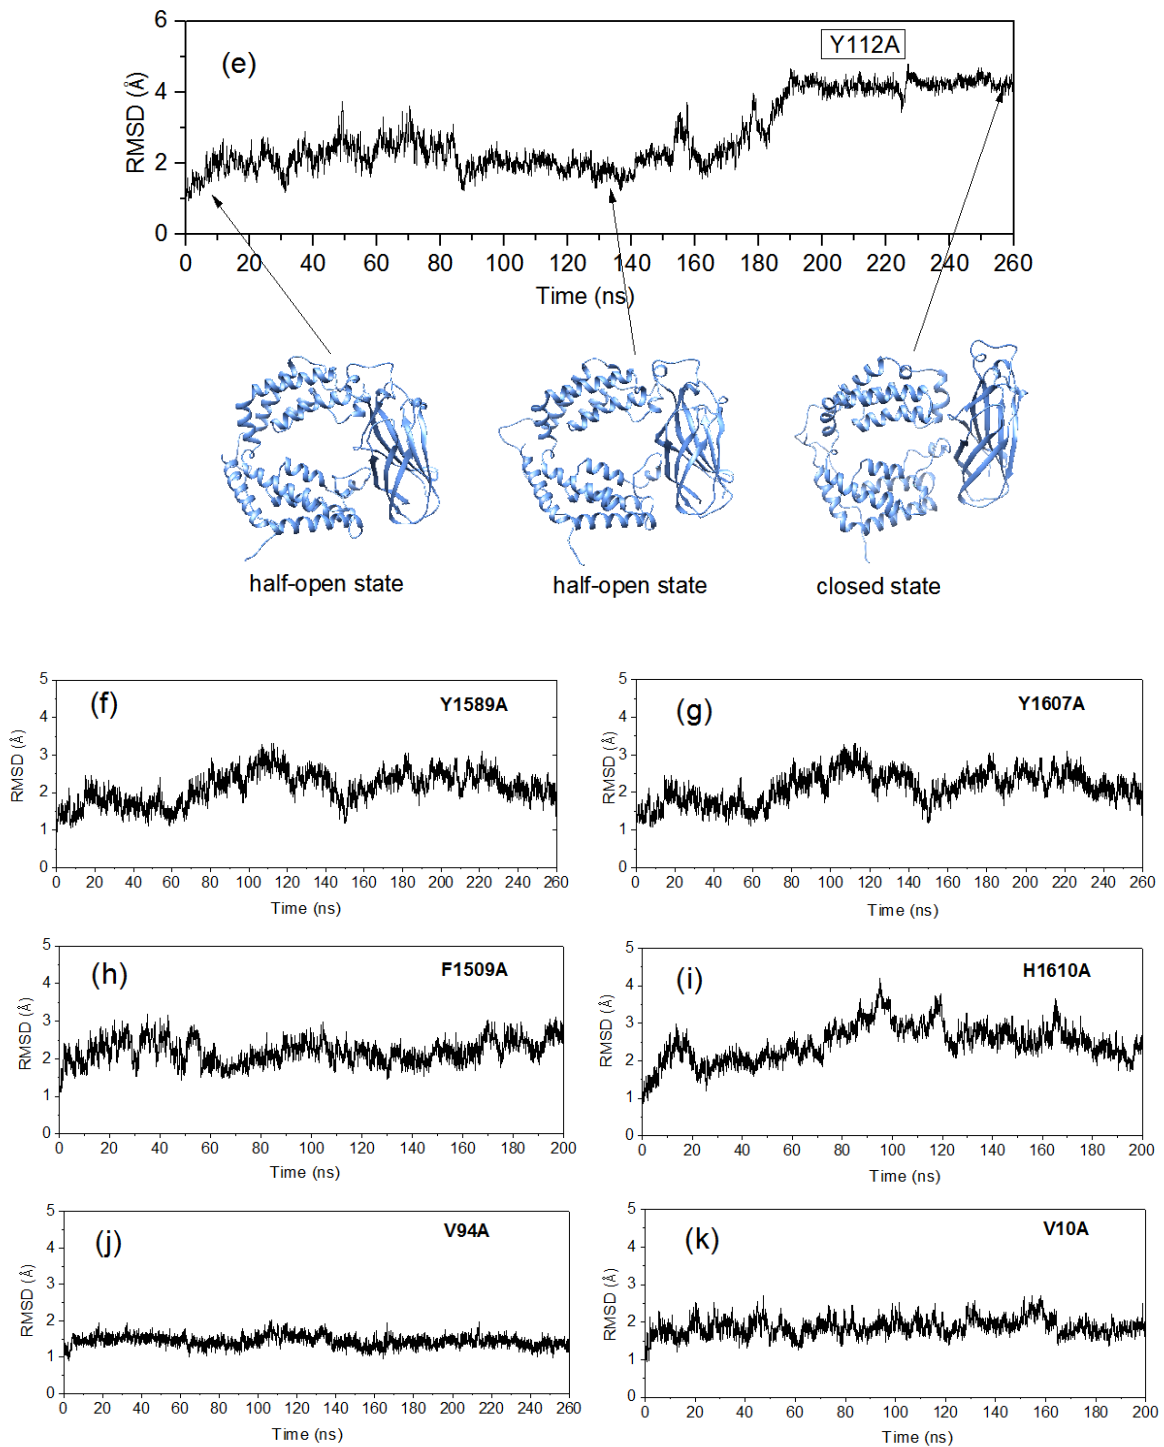

**Figure S1.** The RMSDs of all systems for C $\alpha$  atoms relative to the starting structure. The corresponding structures of unbound DBD(CCG1), WT, F1536A, V92A, and Y112A systems, which show large fluctuation of RMSDs, were extracted from the MD simulations. The structures that were extracted from MD simulations were colored in cornflower blue, and the crystal structure of unbound DBD was colored in orange. The structures of F1536A were in upward view.

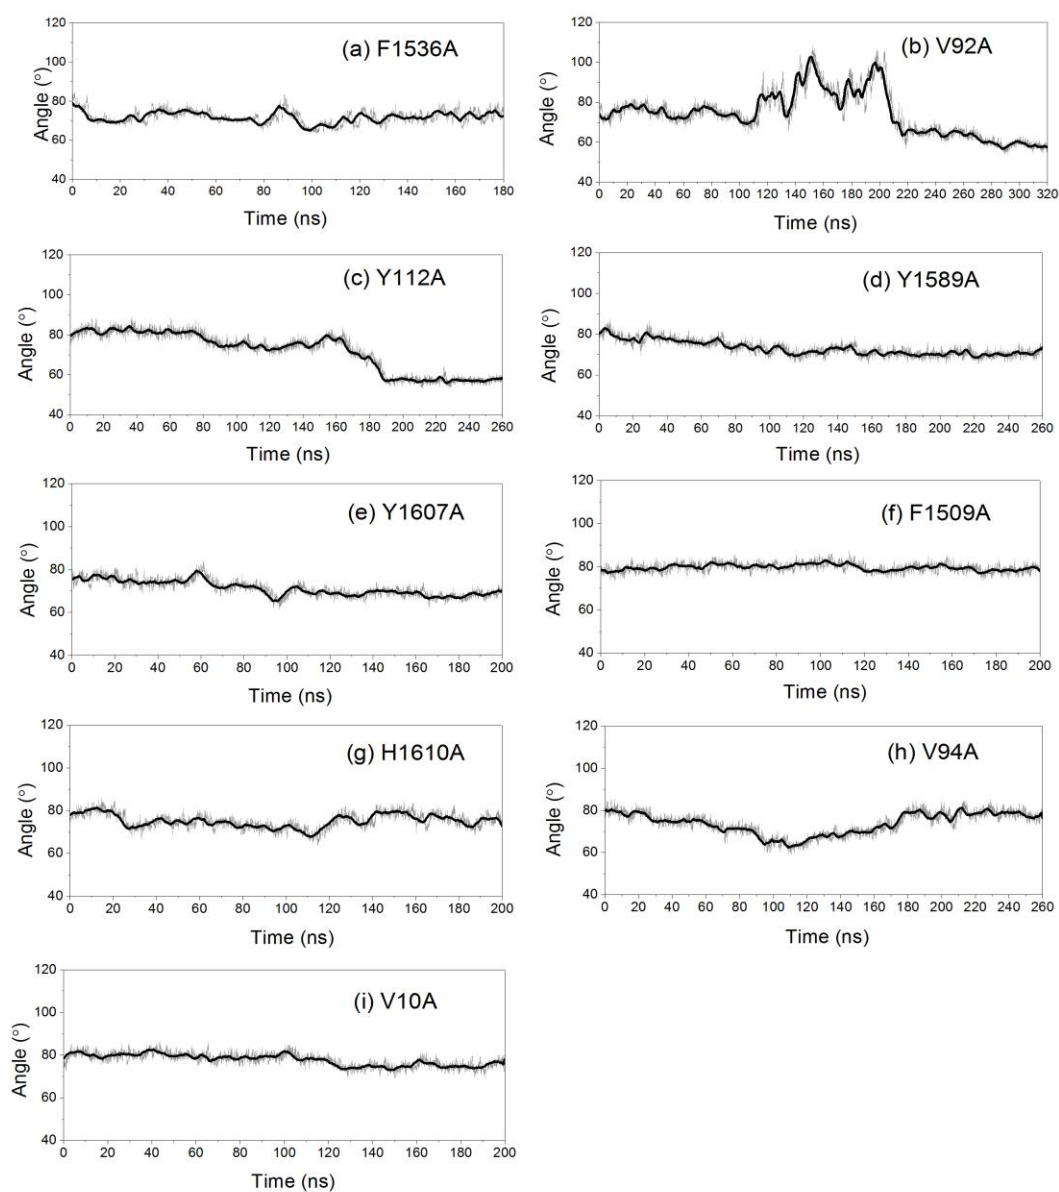

**Figure S2.** The angle curves between two domains of DBD(CCG1) for all mutant systems versus time. The mutations of V92A and Y112A have a great effect on the binding state, and their binding state finally located at the closed binding state.

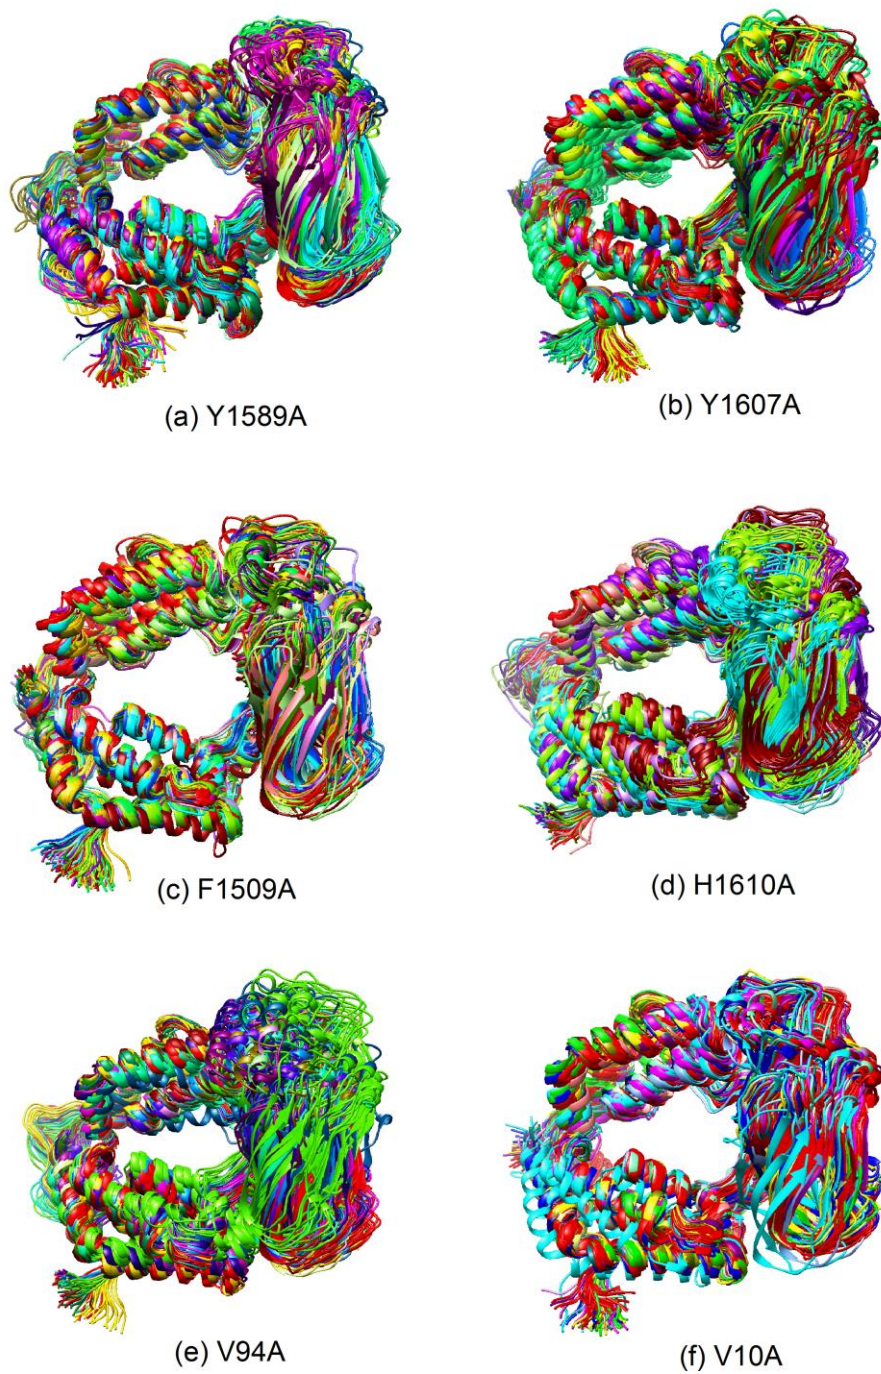

**Figure S3.** Ensemble cluster analysis of (a) Y1589A, (b) Y1607A, (c) F1509A, (d) H1610A, (e) V94A, and (f) V10A systems. These mutant systems do not show binding state change in the MD simulations.



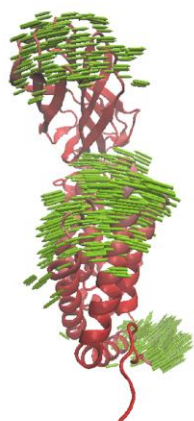

(a) F1536A

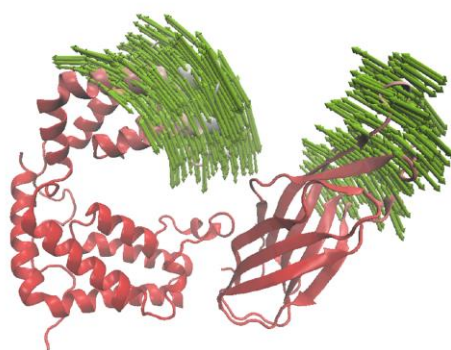

(b) V92A

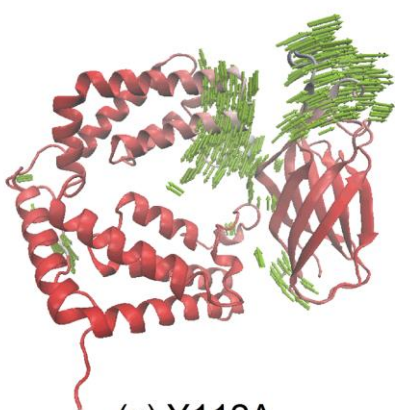

(c) Y112A

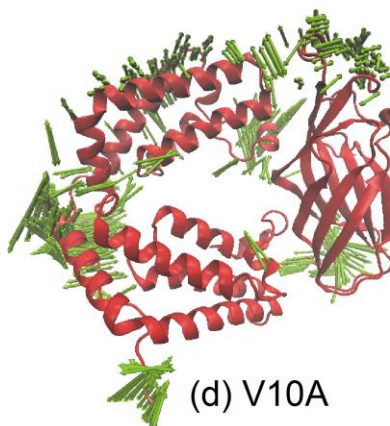

(d) V10A

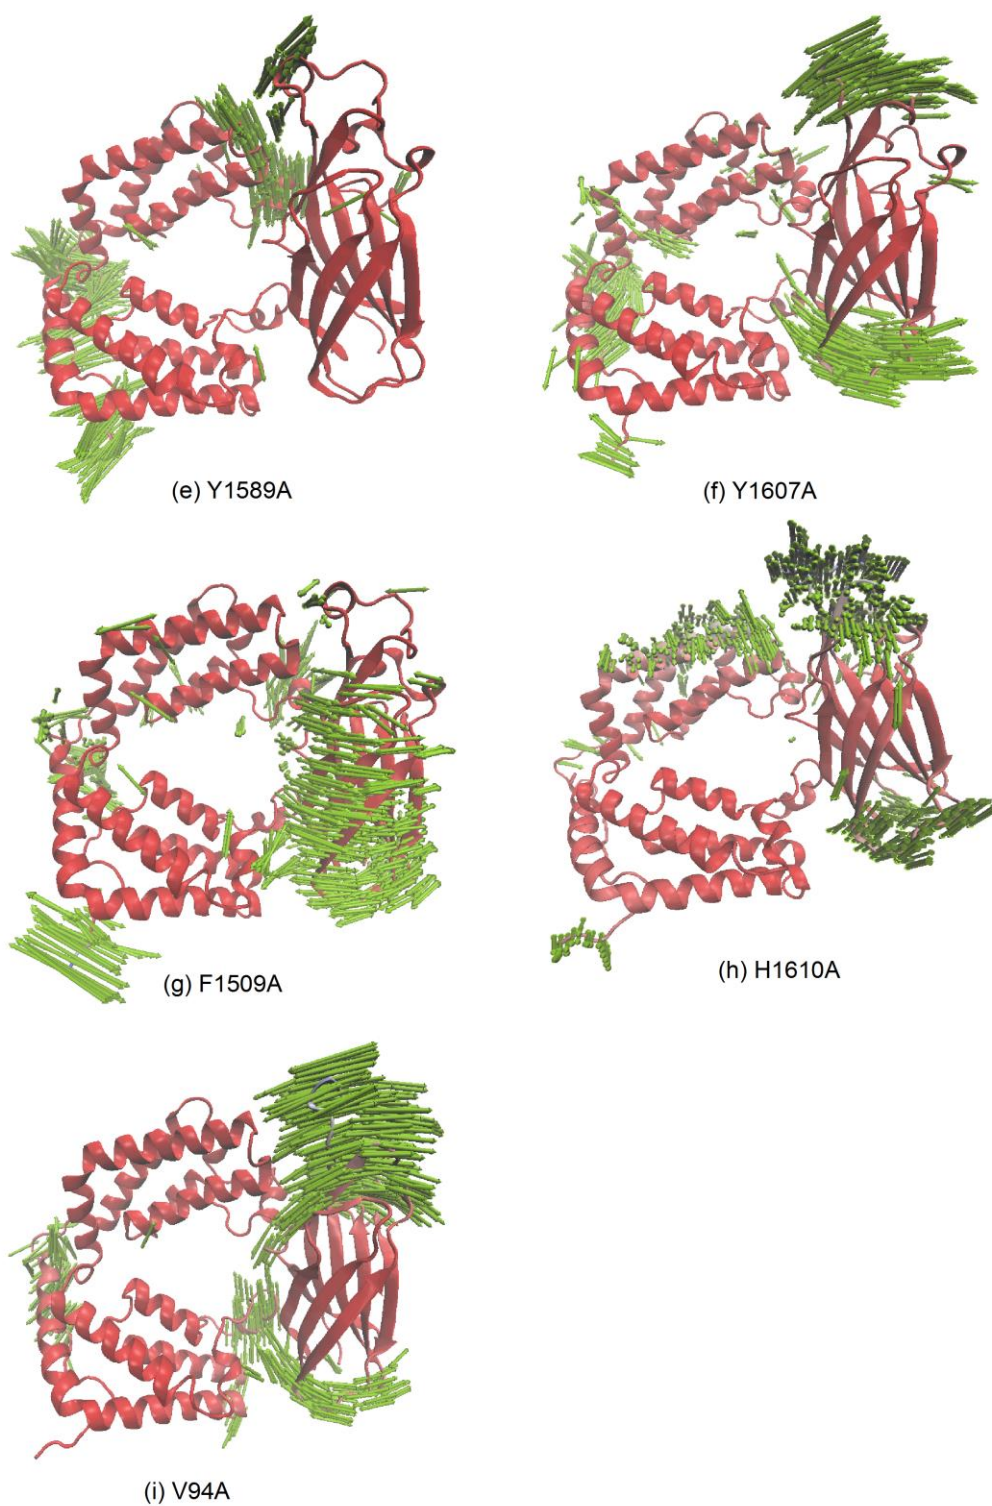

**Figure S4.** Principal component analysis of (a) F1536A, (b) V92A, (c) Y112A, (d) V10A, (e) Y1589A, (f) Y1607A, (g) F1509A, (h) H1610A, and V94A systems. The binding state changes of V92A and Y112A are mainly caused by the movement of domain 1 and the rotation of CIA/ASF1.

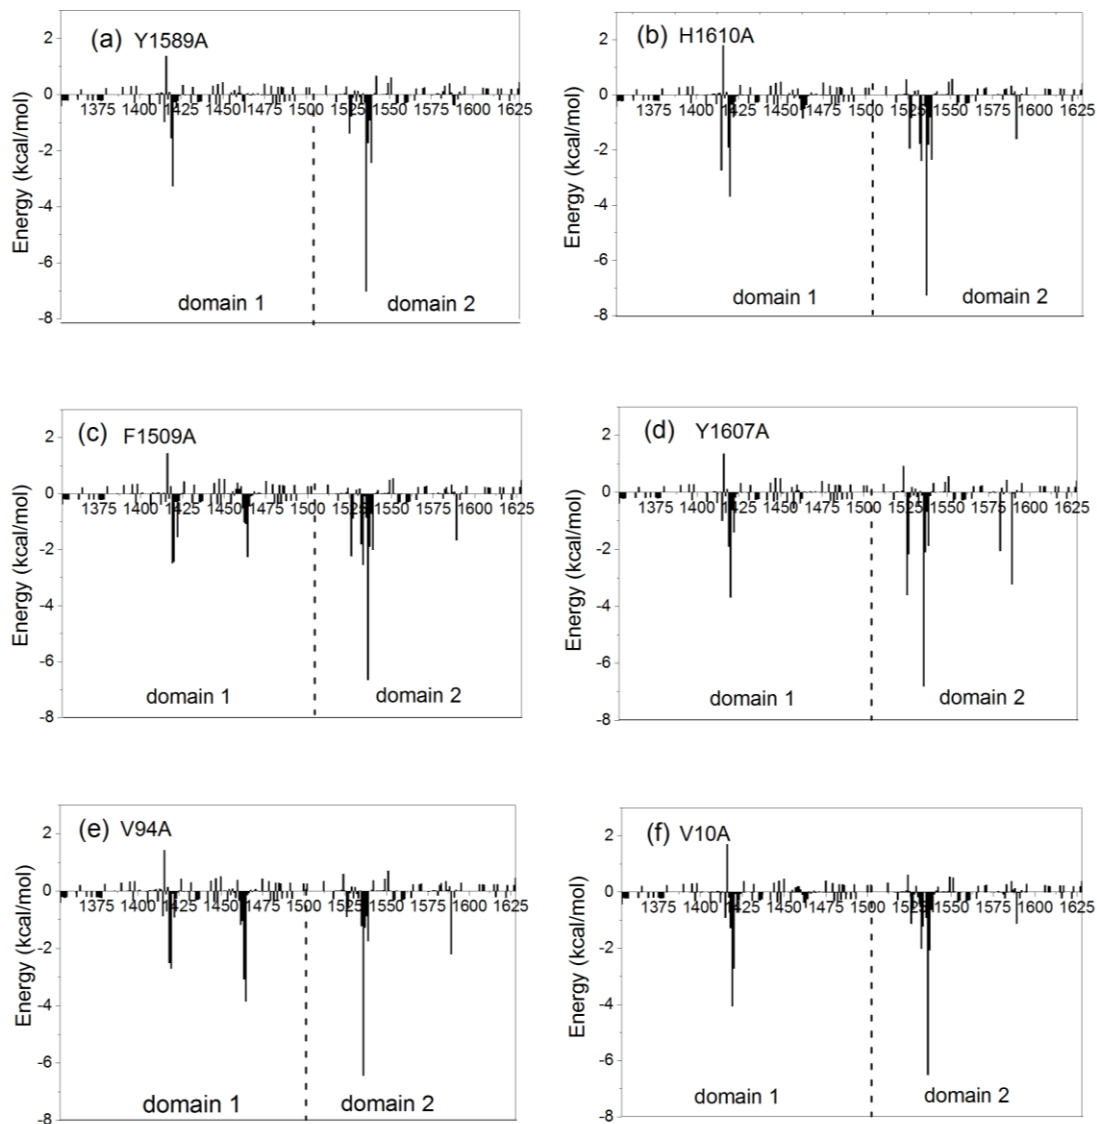

**Figure S5.** Decomposition of the binding free energy on the residue basis for (a) Y1589A, (b) H1610A, (c) F1509A, (d) Y1607A, (e) V94A, and (d) Y1607A systems. The left side of the dotted line shows the energy contribution of domain 1 and the right shows the energy contribution of domain 2. The interaction spectra of these systems are similar to the WT system with a few exceptions.

**Table S1.** The hydrophobic interactions and hydrogen bond analysis of crystal structure and average structure of last 20 ns of CIA/ASF1-DBD(CCG1).

#### Crystal structure of CIA/ASF1-DBD(CCG1)

##### Hydrophobic Interactions

###### Binding site 1a

ILE1420-LEU140

ILE1420-VAL92

TYR1459-VAL92

TRP1526-VAL10

###### Binding site 1b

PHE1536—ILE107

PHE1536-VAL109

PHE1536-VAL109

PHE1536-TYR111

PHE1536-PRO144

PHE1536-VAL146



|                                                   |                |              |
|---------------------------------------------------|----------------|--------------|
| PHE1536-VAL6                                      |                | PHE1536-VAL9 |
| <b>Hydrogen bond</b>                              |                |              |
| <b>Acceptor</b>                                   | Donor          | Distance (Å) |
| TRY1589                                           | ARG69          | 3.42         |
| <b>Average structure of last 20 ns trajectory</b> |                |              |
| <b>Hydrophobic Interactions</b>                   |                |              |
| Binding site 1a                                   |                |              |
| <b>ILE1420-LEU140</b>                             | TRP1526-MET71  |              |
| <b>Binding site 1b</b>                            |                |              |
| PHE1536-ILE107                                    | PHE1536-VAL109 |              |
| PHE1536-TYR111                                    | PHE1536-PRO144 |              |
| PHE1536-VAL6                                      | PHE1536-VAL9   |              |
| VAL1537-VAL6                                      | PRO1538-VAL146 |              |
| <b>Hydrogen bond</b>                              |                |              |
| <b>Acceptor</b>                                   | Donor          | Distance (Å) |
| ASN143@OD1                                        | LYS1535@NZ     | 2.65         |
| GLU29@OE1                                         | TYR1589@OH     | 3.35         |
| GLU29@OE2                                         | TRY1589@OH     | 3.28         |
| ASP1539@OD1                                       | ARG148@NH1     | 2.92         |
| ASP1539@OD1                                       | ARG148@NH1     | 2.92         |
| ASP1539@OD2                                       | ARG148@NH1     | 2.86         |
| ASP1539@OD2                                       | ARG148@NH1     | 2.86         |
| ASP1539@OD1                                       | ARG148@NH2     | 2.91         |
| ASP1539@OD1                                       | ARG148@NH2     | 2.91         |
| ASP1539@OD2                                       | ARG148@NH2     | 2.83         |
| ASP1539@OD2                                       | ARG148@NH2     | 2.83         |

**Table S2.** The binding energy contributions of key residues for all systems. Vdw van der Waals energy; ele, electrostatic energy; GB, polar solvation energy; SA, non-polar solvation energy; S, side-chain atoms; B, back-bone atoms; T, total energy. All values are given in kcal/mol.

| Residue       | S <sub>V</sub> DW | B <sub>V</sub> DW | T <sub>V</sub> DW | S <sub>E</sub> LE | B <sub>E</sub> LE | T <sub>E</sub> LE | S <sub>G</sub> B | B <sub>G</sub> B | T <sub>G</sub> B | T <sub>SUR</sub> | T <sub>G</sub> BTOT |
|---------------|-------------------|-------------------|-------------------|-------------------|-------------------|-------------------|------------------|------------------|------------------|------------------|---------------------|
| <b>WT</b>     |                   |                   |                   |                   |                   |                   |                  |                  |                  |                  |                     |
| <b>K1415</b>  | -0.14             | -0.07             | -0.22             | -50.58            | -10.71            | -61.29            | 49.39            | 10.8             | 60.19            | -0.09            | -1.41               |
| <b>K1419</b>  | -1.03             | -0.74             | -1.77             | -48.11            | -9.73             | -57.84            | 47.43            | 10.91            | 58.34            | -0.36            | -1.63               |
| <b>I1420</b>  | -2.68             | -0.68             | -3.35             | -1.41             | -1.45             | -2.87             | 1.34             | 1.62             | 2.96             | -0.46            | -3.72               |
| <b>K1535</b>  | -2.08             | -1.05             | -3.13             | -37.85            | -6.96             | -44.81            | 38               | 9.03             | 47.03            | -0.48            | -1.39               |
| <b>F1536</b>  | -6.72             | -1.29             | -8                | -1.9              | -1.68             | -3.58             | 2.81             | 3.19             | 6.01             | -0.89            | -6.46               |
| <b>V1537</b>  | -1.39             | -0.39             | -1.77             | -0.52             | 1.61              | 1.09              | 0.49             | -1.02            | -0.54            | -0.2             | -1.43               |
| <b>P1538</b>  | -1.02             | -0.22             | -1.24             | 0.26              | 2.49              | 2.75              | 0.04             | -2.46            | -2.42            | -0.17            | -1.07               |
| <b>D1539</b>  | 0.74              | -0.17             | 0.58              | -29.06            | 1.74              | -27.32            | 26.62            | -1.68            | 24.93            | -0.18            | -2                  |
| <b>Y1589</b>  | -0.94             | -0.03             | -0.97             | -6.33             | 0.57              | -5.76             | 5.1              | -0.54            | 4.55             | -0.3             | -2.47               |
| <b>N8</b>     | -1.27             | -0.65             | -1.92             | -2.08             | 0.86              | -1.21             | 3.42             | -1.09            | 2.33             | -0.14            | -0.95               |
| <b>V9</b>     | -0.73             | -0.69             | -1.42             | 1.09              | -3.02             | -1.93             | -1.12            | 3.43             | 2.31             | -0.07            | -1.11               |
| <b>Y112</b>   | -2.79             | -0.13             | -2.92             | 1.18              | -1.93             | -0.75             | 0.04             | 2.02             | 2.06             | -0.32            | -1.93               |
| <b>L140</b>   | -1.89             | -0.24             | -2.13             | 1.48              | -2.78             | -1.3              | -1.31            | 3.24             | 1.93             | -0.3             | -1.8                |
| <b>N143</b>   | -2.21             | -0.6              | -2.81             | -12.05            | 2.28              | -9.77             | 11.89            | -1.22            | 10.68            | -0.46            | -2.37               |
| <b>P144</b>   | -1.72             | -0.34             | -2.06             | 16.56             | -26.38            | -9.82             | -16.18           | 25.02            | 8.84             | -0.3             | -3.34               |
| <b>V146</b>   | -2.08             | -0.39             | -2.46             | 1.23              | -3.03             | -1.8              | -1.21            | 3.44             | 2.23             | -0.3             | -2.34               |
| <b>R148</b>   | -0.25             | -0.04             | -0.29             | 21.81             | 11.53             | 33.34             | -25.95           | -11.25           | -37.2            | -0.39            | -4.54               |
| <b>F1536A</b> |                   |                   |                   |                   |                   |                   |                  |                  |                  |                  |                     |
| <b>V1414</b>  | -0.82             | -0.4              | -1.22             | -0.9              | -0.43             | -1.34             | 0.92             | 0.72             | 1.64             | -0.1             | -1.01               |

|               |       |       |       |        |        |        |        |        |        |       |       |
|---------------|-------|-------|-------|--------|--------|--------|--------|--------|--------|-------|-------|
| <b>K1415</b>  | -1.33 | -0.4  | -1.73 | -49.3  | -14.15 | -63.45 | 49.6   | 14.51  | 64.11  | -0.19 | -1.26 |
| <b>D1416</b>  | -0.62 | -0.85 | -1.48 | 26.36  | 8.65   | 35.01  | -28.22 | -7.92  | -36.14 | -0.43 | -3.04 |
| <b>K1419</b>  | -2.11 | -0.37 | -2.48 | -65.73 | -10.74 | -76.47 | 66.07  | 11.4   | 77.47  | -0.39 | -1.88 |
| <b>I1420</b>  | -2.02 | -0.22 | -2.24 | -1.17  | 0.7    | -0.47  | 1.2    | -0.53  | 0.67   | -0.32 | -2.36 |
| <b>Y1459</b>  | -2.62 | -0.67 | -3.29 | -3.1   | -1.18  | -4.27  | 3.78   | 1.87   | 5.65   | -0.31 | -2.23 |
| <b>H1464</b>  | -0.74 | -0.08 | -0.81 | -8.14  | -2.98  | -11.12 | 6.39   | 3.05   | 9.44   | -0.24 | -2.73 |
| <b>S47</b>    | 0.82  | -0.42 | 0.41  | -11.03 | -4.29  | -15.33 | 4.44   | 2.9    | 7.34   | -0.08 | -7.66 |
| <b>A48</b>    | -1.46 | -0.58 | -2.04 | 2.33   | -4.19  | -1.86  | -2.26  | 3.55   | 1.29   | -0.21 | -2.83 |
| <b>E49</b>    | -0.85 | -0.19 | -1.04 | -63.37 | -22    | -85.37 | 63.31  | 20.05  | 83.37  | -0.18 | -3.24 |
| <b>A87</b>    | -0.89 | -1.03 | -1.92 | 2.76   | -3.75  | -0.99  | -2.73  | 4.57   | 1.84   | -0.31 | -1.38 |
| <b>D88</b>    | -0.41 | 0     | -0.41 | -17.85 | 0      | -17.85 | 13.5   | 0      | 13.5   | -0.18 | -4.93 |
| <b>V92</b>    | -2.45 | -1.21 | -3.66 | 1.32   | 0.25   | 1.57   | -1.17  | 0.61   | -0.56  | -0.31 | -2.95 |
| <b>N114</b>   | -1.55 | -0.18 | -1.73 | -2.68  | -0.62  | -3.3   | 2.78   | 0.74   | 3.53   | -0.22 | -1.72 |
| <b>L140</b>   | -1.51 | -0.11 | -1.62 | 1.45   | -1.66  | -0.21  | -1.37  | 1.87   | 0.5    | -0.18 | -1.5  |
| <b>Y1589A</b> |       |       |       |        |        |        |        |        |        |       |       |
| <b>K1415</b>  | -0.11 | -0.08 | -0.2  | -47.11 | -10.33 | -57.45 | 46.28  | 10.45  | 56.73  | -0.07 | -0.98 |
| <b>K1419</b>  | -1.76 | -1.02 | -2.78 | -38.42 | -7.95  | -46.38 | 38.44  | 9.57   | 48.01  | -0.41 | -1.56 |
| <b>I1420</b>  | -2.52 | -0.89 | -3.41 | -1.28  | -0.91  | -2.19  | 1.22   | 1.52   | 2.74   | -0.41 | -3.27 |
| <b>K1535</b>  | -2.27 | -0.84 | -3.11 | -32.71 | -7.55  | -40.26 | 34.37  | 9.24   | 43.6   | -0.51 | -0.28 |
| <b>F1536</b>  | -6.86 | -1.11 | -7.97 | -1.87  | -2.88  | -4.75  | 2.84   | 3.74   | 6.58   | -0.89 | -7.02 |
| <b>V1537</b>  | -1.66 | -0.43 | -2.09 | -0.67  | 1.57   | 0.91   | 0.64   | -0.96  | -0.32  | -0.22 | -1.72 |
| <b>P1538</b>  | -0.92 | -0.21 | -1.12 | -0.13  | 2.67   | 2.54   | 0.42   | -2.63  | -2.21  | -0.13 | -0.92 |
| <b>D1539</b>  | 0.53  | -0.17 | 0.36  | -28.18 | 1.75   | -26.43 | 25.54  | -1.71  | 23.83  | -0.2  | -2.44 |
| <b>N8</b>     | -1.32 | -0.69 | -2.01 | -2.87  | 0.97   | -1.9   | 4.11   | -1.2   | 2.9    | -0.14 | -1.14 |
| <b>V9</b>     | -0.7  | -0.64 | -1.34 | 1.13   | -3.17  | -2.04  | -1.15  | 3.58   | 2.43   | -0.07 | -1.02 |
| <b>Y112</b>   | -2.81 | -0.12 | -2.92 | -0.28  | -2.05  | -2.33  | 1.16   | 2.14   | 3.3    | -0.36 | -2.32 |
| <b>L140</b>   | -1.74 | -0.17 | -1.91 | 1.49   | -2.57  | -1.08  | -1.35  | 2.95   | 1.6    | -0.28 | -1.68 |
| <b>N143</b>   | -2.55 | -0.62 | -3.18 | -10    | 2.48   | -7.52  | 10.05  | -1.28  | 8.78   | -0.46 | -2.38 |
| <b>P144</b>   | -1.46 | -0.2  | -1.66 | 16.83  | -26.55 | -9.72  | -16.42 | 24.66  | 8.24   | -0.24 | -3.38 |
| <b>V146</b>   | -2.19 | -0.36 | -2.55 | 1.45   | -3.39  | -1.94  | -1.38  | 3.64   | 2.26   | -0.3  | -2.52 |
| <b>R148</b>   | -0.4  | -0.05 | -0.44 | 25.74  | 12.36  | 38.09  | -30.11 | -12.05 | -42.16 | -0.38 | -4.88 |
| <b>H1610A</b> |       |       |       |        |        |        |        |        |        |       |       |
| <b>K1415</b>  | 0.03  | -0.09 | -0.06 | -67.52 | -10.71 | -78.23 | 64.85  | 10.89  | 75.74  | -0.18 | -2.73 |
| <b>K1419</b>  | -1.69 | -0.88 | -2.57 | -39.32 | -9.53  | -48.85 | 39.43  | 10.52  | 49.95  | -0.41 | -1.89 |
| <b>I1420</b>  | -2.66 | -0.73 | -3.39 | -1.41  | -2.05  | -3.45  | 1.31   | 2.27   | 3.59   | -0.43 | -3.68 |
| <b>W1526</b>  | -2.57 | -0.13 | -2.7  | -2.82  | 1.4    | -1.41  | 3.64   | -1.05  | 2.59   | -0.42 | -1.94 |
| <b>V1532</b>  | -1.38 | -0.47 | -1.85 | -0.42  | -1.24  | -1.65  | 0.5    | 1.43   | 1.93   | -0.19 | -1.76 |
| <b>N1533</b>  | -1.4  | -0.49 | -1.89 | -4.31  | -1.75  | -6.06  | 4.33   | 1.42   | 5.75   | -0.2  | -2.39 |
| <b>F1536</b>  | -7.38 | -1.3  | -8.69 | -1.68  | -3.6   | -5.28  | 2.83   | 4.75   | 7.59   | -0.89 | -7.27 |
| <b>V1537</b>  | -1.86 | -0.49 | -2.36 | -0.71  | 2.42   | 1.71   | 0.71   | -1.64  | -0.94  | -0.21 | -1.79 |
| <b>D1539</b>  | 0.59  | -0.15 | 0.44  | -21.48 | 2.71   | -18.78 | 18.65  | -2.52  | 16.13  | -0.15 | -2.35 |
| <b>Y1589</b>  | -0.56 | -0.02 | -0.58 | -5.28  | 0.22   | -5.06  | 4.48   | -0.2   | 4.28   | -0.24 | -1.59 |
| <b>N7</b>     | -1.73 | -1.74 | -3.47 | 1.25   | -5.56  | -4.31  | 0.15   | 6.82   | 6.98   | -0.36 | -1.16 |
| <b>N8</b>     | -1.76 | -0.92 | -2.68 | -4.07  | 1.1    | -2.97  | 4.91   | -1.33  | 3.57   | -0.23 | -2.31 |
| <b>V9</b>     | -0.67 | -0.64 | -1.31 | 1.05   | -3.12  | -2.07  | -1.07  | 3.54   | 2.46   | -0.06 | -0.97 |
| <b>Y112</b>   | -2.94 | -0.13 | -3.07 | 0.86   | -1.93  | -1.07  | 0.37   | 2.01   | 2.39   | -0.32 | -2.07 |
| <b>L140</b>   | -1.77 | -0.18 | -1.95 | 1.44   | -2.37  | -0.93  | -1.27  | 2.74   | 1.47   | -0.28 | -1.69 |
| <b>N143</b>   | -1.7  | -0.44 | -2.14 | -8.08  | 2.07   | -6.01  | 7.87   | -1.36  | 6.51   | -0.34 | -1.97 |
| <b>P144</b>   | -1.42 | -0.48 | -1.9  | 16.65  | -20.74 | -4.09  | -16.21 | 20.43  | 4.22   | -0.24 | -2.01 |

|               |       |       |       |        |        |        |        |        |        |       |       |
|---------------|-------|-------|-------|--------|--------|--------|--------|--------|--------|-------|-------|
| <b>V146</b>   | -2.25 | -0.28 | -2.53 | 1.26   | -2.53  | -1.26  | -1.22  | 2.75   | 1.53   | -0.27 | -2.54 |
| <b>R148</b>   | -1.05 | -0.06 | -1.11 | 20.17  | 11.33  | 31.5   | -24.49 | -11.02 | -35.51 | -0.42 | -5.53 |
| <b>F1509A</b> |       |       |       |        |        |        |        |        |        |       |       |
| <b>K1419</b>  | -3    | -1.52 | -4.52 | -46.8  | -9.88  | -56.69 | 47.29  | 12.05  | 59.34  | -0.63 | -2.49 |
| <b>I1420</b>  | -2.22 | -0.93 | -3.15 | -1.54  | 1.09   | -0.45  | 1.51   | 0.03   | 1.55   | -0.38 | -2.43 |
| <b>T1422</b>  | -0.93 | -0.41 | -1.34 | -3.42  | 0.13   | -3.29  | 3.15   | 0.27   | 3.42   | -0.34 | -1.55 |
| <b>P1462</b>  | -0.67 | -0.22 | -0.9  | -10.06 | 8.93   | -1.13  | 10.14  | -9.04  | 1.1    | -0.11 | -1.03 |
| <b>K1463</b>  | -0.64 | -0.48 | -1.11 | -45.37 | -13.25 | -58.62 | 45.15  | 13.66  | 58.81  | -0.17 | -1.09 |
| <b>H1464</b>  | -1.66 | -0.33 | -1.99 | -4.61  | -4.48  | -9.09  | 4.44   | 4.7    | 9.14   | -0.31 | -2.26 |
| <b>W1526</b>  | -2.76 | -0.17 | -2.93 | -2.27  | 1.82   | -0.45  | 3.07   | -1.46  | 1.61   | -0.47 | -2.24 |
| <b>V1532</b>  | -1.41 | -0.48 | -1.89 | -0.44  | -1.21  | -1.64  | 0.52   | 1.4    | 1.92   | -0.19 | -1.8  |
| <b>N1533</b>  | -1.42 | -0.52 | -1.94 | -4.35  | -1.87  | -6.22  | 4.32   | 1.48   | 5.8    | -0.19 | -2.55 |
| <b>F1536</b>  | -6.77 | -1.14 | -7.91 | -1.74  | -3.43  | -5.17  | 2.77   | 4.51   | 7.29   | -0.86 | -6.65 |
| <b>V1537</b>  | -1.91 | -0.44 | -2.36 | -0.74  | 2.5    | 1.76   | 0.74   | -1.83  | -1.09  | -0.22 | -1.9  |
| <b>D1539</b>  | 0.78  | -0.13 | 0.66  | -20.02 | 3.04   | -16.98 | 17.34  | -2.88  | 14.46  | -0.15 | -2    |
| <b>Y1589</b>  | -0.48 | -0.02 | -0.5  | -5.79  | 0.11   | -5.67  | 4.84   | -0.09  | 4.75   | -0.23 | -1.66 |
| <b>N7</b>     | -1.78 | -1.79 | -3.57 | 0.81   | -5.61  | -4.8   | 0.59   | 6.79   | 7.38   | -0.36 | -1.36 |
| <b>N8</b>     | -1.87 | -0.95 | -2.82 | -4.49  | 1.19   | -3.29  | 5.36   | -1.41  | 3.96   | -0.24 | -2.39 |
| <b>V9</b>     | -0.71 | -0.75 | -1.46 | 1.02   | -3.37  | -2.35  | -1.05  | 3.85   | 2.8    | -0.07 | -1.08 |
| <b>L140</b>   | -3.01 | -0.23 | -3.24 | 1.46   | -2.78  | -1.32  | -1.33  | 3.04   | 1.71   | -0.38 | -3.23 |
| <b>S142</b>   | -0.21 | -0.25 | -0.46 | 0.85   | -7.52  | -6.67  | -1.18  | 7.53   | 6.35   | -0.21 | -0.98 |
| <b>P144</b>   | -1.16 | -0.3  | -1.47 | 15.92  | -20.97 | -5.06  | -15.54 | 20.39  | 4.85   | -0.2  | -1.87 |
| <b>V146</b>   | -1.81 | -0.23 | -2.04 | 1.21   | -2.51  | -1.3   | -1.18  | 2.71   | 1.54   | -0.26 | -2.07 |
| <b>R148</b>   | -0.57 | -0.05 | -0.62 | 19.54  | 10.77  | 30.31  | -23.65 | -10.49 | -34.15 | -0.39 | -4.84 |
| <b>Y1607A</b> |       |       |       |        |        |        |        |        |        |       |       |
| <b>K1415</b>  | 0.01  | -0.06 | -0.04 | -42.34 | -8.71  | -51.06 | 41.36  | 8.79   | 50.14  | -0.04 | -1    |
| <b>K1419</b>  | -1.41 | -0.75 | -2.16 | -38.36 | -9.53  | -47.89 | 38.29  | 10.25  | 48.53  | -0.39 | -1.91 |
| <b>I1420</b>  | -2.56 | -0.72 | -3.28 | -1.35  | -2.23  | -3.58  | 1.28   | 2.33   | 3.61   | -0.43 | -3.69 |
| <b>T1422</b>  | -1.38 | -0.63 | -2    | -1.68  | -0.62  | -2.3   | 2.17   | 0.96   | 3.12   | -0.22 | -1.4  |
| <b>F1536</b>  | -6.87 | -1.09 | -7.96 | -1.75  | -2.62  | -4.37  | 2.68   | 3.71   | 6.39   | -0.87 | -6.8  |
| <b>V1537</b>  | -2.08 | -0.4  | -2.48 | -0.39  | 1.55   | 1.16   | 0.43   | -0.95  | -0.53  | -0.25 | -2.1  |
| <b>D1539</b>  | 0.38  | -0.18 | 0.2   | -29.41 | 0.73   | -28.68 | 27.35  | -0.52  | 26.82  | -0.23 | -1.88 |
| <b>Y1582</b>  | -1.69 | -0.09 | -1.79 | -2.01  | -5.19  | -7.19  | 2.44   | 4.76   | 7.21   | -0.27 | -2.05 |
| <b>Y1589</b>  | -2.83 | -0.08 | -2.91 | -4.19  | 0.67   | -3.51  | 4.28   | -0.62  | 3.66   | -0.46 | -3.22 |
| <b>N8</b>     | -1.25 | -0.69 | -1.94 | -2.65  | 0.81   | -1.84  | 3.73   | -1.1   | 2.63   | -0.14 | -1.3  |
| <b>I31</b>    | -1.44 | -0.31 | -1.75 | 1.09   | -1.57  | -0.48  | -1.06  | 1.81   | 0.74   | -0.24 | -1.73 |
| <b>R69</b>    | -4.7  | -0.66 | -5.37 | 39.47  | 9.52   | 48.99  | -36.43 | -8.59  | -45.02 | -0.59 | -1.99 |
| <b>Y112</b>   | -2.9  | -0.12 | -3.03 | 0.79   | -1.76  | -0.97  | 0.35   | 1.84   | 2.19   | -0.29 | -2.09 |
| <b>L140</b>   | -1.8  | -0.25 | -2.05 | 1.29   | -2.43  | -1.14  | -1.15  | 2.87   | 1.72   | -0.28 | -1.74 |
| <b>N143</b>   | -2.38 | -0.62 | -3.01 | -11.92 | 2.33   | -9.6   | 10.78  | -1.46  | 9.31   | -0.36 | -3.65 |
| <b>P144</b>   | -1.49 | -0.47 | -1.96 | 15.95  | -22.14 | -6.19  | -15.56 | 21.44  | 5.89   | -0.25 | -2.52 |
| <b>V146</b>   | -1.93 | -0.29 | -2.23 | 1.28   | -2.99  | -1.71  | -1.24  | 3.28   | 2.04   | -0.27 | -2.17 |
| <b>R148</b>   | -0.28 | -0.04 | -0.32 | 19.9   | 11.36  | 31.26  | -24.67 | -11.06 | -35.73 | -0.36 | -5.15 |
| <b>V94A</b>   |       |       |       |        |        |        |        |        |        |       |       |
| <b>K1419</b>  | -2.65 | -1.09 | -3.74 | -57.46 | -10.91 | -68.37 | 57.79  | 12.44  | 70.23  | -0.62 | -2.5  |
| <b>I1420</b>  | -2.72 | -0.76 | -3.48 | -1.43  | 0.12   | -1.3   | 1.4    | 1.09   | 2.49   | -0.42 | -2.7  |
| <b>T1422</b>  | -1.17 | -0.23 | -1.4  | -1.88  | 0.16   | -1.72  | 2.35   | 0.21   | 2.55   | -0.34 | -0.91 |
| <b>P1462</b>  | -0.8  | -0.25 | -1.05 | -10.19 | 8.9    | -1.29  | 10.36  | -9.08  | 1.28   | -0.11 | -1.18 |
| <b>K1463</b>  | -0.84 | -0.45 | -1.29 | -47.79 | -12.86 | -60.65 | 47.65  | 13.5   | 61.15  | -0.24 | -1.03 |

|              |       |       |       |        |        |        |        |        |        |       |       |
|--------------|-------|-------|-------|--------|--------|--------|--------|--------|--------|-------|-------|
| <b>H1464</b> | -2.17 | -0.23 | -2.4  | -0.83  | -8.04  | -8.87  | 1.8    | 6.66   | 8.46   | -0.26 | -3.07 |
| <b>S1465</b> | 0.34  | -0.2  | 0.14  | -9.2   | -3.54  | -12.74 | 6.37   | 2.48   | 8.85   | -0.09 | -3.84 |
| <b>K1535</b> | -2.03 | -0.79 | -2.82 | -32.59 | -7.12  | -39.71 | 33.08  | 8.73   | 41.81  | -0.49 | -1.22 |
| <b>F1536</b> | -6.7  | -1.12 | -7.82 | -1.72  | -1.83  | -3.55  | 2.77   | 3.04   | 5.81   | -0.87 | -6.43 |
| <b>V1537</b> | -1.28 | -0.33 | -1.6  | -0.5   | 1.58   | 1.08   | 0.49   | -1.04  | -0.55  | -0.19 | -1.27 |
| <b>P1538</b> | -0.86 | -0.19 | -1.05 | 0.31   | 2.3    | 2.61   | -0.06  | -2.24  | -2.3   | -0.13 | -0.87 |
| <b>D1539</b> | 0.53  | -0.15 | 0.38  | -25.07 | 1.67   | -23.4  | 23.06  | -1.63  | 21.44  | -0.16 | -1.74 |
| <b>Y1589</b> | -1.37 | -0.03 | -1.4  | -5.51  | 0.68   | -4.82  | 4.98   | -0.66  | 4.33   | -0.3  | -2.2  |
| <b>N8</b>    | -1.33 | -0.69 | -2.02 | -2.84  | 1.05   | -1.79  | 3.99   | -1.24  | 2.75   | -0.15 | -1.21 |
| <b>V9</b>    | -0.72 | -0.67 | -1.39 | 1.1    | -3.02  | -1.92  | -1.12  | 3.45   | 2.33   | -0.07 | -1.05 |
| <b>V92</b>   | -1.86 | -0.26 | -2.11 | 1.44   | -0.92  | 0.53   | -1.36  | 1.2    | -0.16  | -0.32 | -2.07 |
| <b>Y112</b>  | -2.43 | -0.14 | -2.57 | 1.19   | -1.61  | -0.42  | -0.52  | 1.77   | 1.24   | -0.22 | -1.97 |
| <b>L140</b>  | -2.09 | -0.19 | -2.29 | 1.34   | -2.66  | -1.32  | -1.34  | 2.98   | 1.64   | -0.29 | -2.25 |
| <b>P144</b>  | -1.45 | -0.22 | -1.67 | 16.63  | -24.64 | -8.01  | -16.25 | 23.65  | 7.4    | -0.27 | -2.55 |
| <b>V146</b>  | -1.96 | -0.3  | -2.27 | 1.32   | -2.84  | -1.52  | -1.26  | 3.08   | 1.82   | -0.28 | -2.24 |
| <b>R148</b>  | -0.66 | -0.05 | -0.71 | 21.76  | 11.33  | 33.08  | -25.22 | -11.03 | -36.25 | -0.4  | -4.28 |
| <b>V10A</b>  |       |       |       |        |        |        |        |        |        |       |       |
| <b>K1415</b> | -0.21 | -0.12 | -0.34 | -46.07 | -10.43 | -56.5  | 45.33  | 10.65  | 55.98  | -0.06 | -0.91 |
| <b>Y1418</b> | -0.46 | -0.14 | -0.6  | -0.95  | -3.83  | -4.78  | 1.09   | 3.14   | 4.23   | -0.13 | -1.27 |
| <b>K1419</b> | -3.12 | -1.69 | -4.81 | -65.86 | -8.99  | -74.85 | 65.01  | 11.34  | 76.35  | -0.75 | -4.06 |
| <b>I1420</b> | -2.24 | -0.91 | -3.15 | -1.41  | -0.51  | -1.92  | 1.4    | 1.35   | 2.75   | -0.39 | -2.72 |
| <b>W1526</b> | -1.96 | -0.07 | -2.03 | -1.67  | 0.37   | -1.3   | 2.75   | -0.17  | 2.58   | -0.37 | -1.12 |
| <b>V1532</b> | -1.44 | -0.52 | -1.97 | -0.08  | -0.98  | -1.05  | 0.1    | 1.07   | 1.17   | -0.17 | -2.02 |
| <b>N1533</b> | -1.72 | -0.46 | -2.18 | -2.23  | -2.67  | -4.89  | 3.68   | 2.39   | 6.07   | -0.2  | -1.22 |
| <b>F1536</b> | -6.81 | -1.13 | -7.94 | -1.37  | -3.63  | -5     | 2.7    | 4.61   | 7.3    | -0.88 | -6.51 |
| <b>V1537</b> | -2.01 | -0.41 | -2.41 | -0.48  | 1.74   | 1.26   | 0.49   | -1.18  | -0.69  | -0.23 | -2.07 |
| <b>Y1589</b> | -1.93 | -0.03 | -1.96 | -2.16  | 0.91   | -1.25  | 3.27   | -0.87  | 2.4    | -0.33 | -1.13 |
| <b>N8</b>    | -2.04 | -0.67 | -2.71 | -1.56  | 1.71   | 0.15   | 2.73   | -1.13  | 1.6    | -0.32 | -1.28 |
| <b>A48</b>   | -0.37 | -0.04 | -0.41 | 2.55   | -7.73  | -5.17  | -2.52  | 7.2    | 4.68   | -0.07 | -0.97 |
| <b>E49</b>   | -0.09 | -0.12 | -0.22 | -84.14 | -12.78 | -96.93 | 83.54  | 12.44  | 95.97  | -0.17 | -1.34 |
| <b>V92</b>   | -1.27 | -0.13 | -1.4  | 1.46   | -0.77  | 0.69   | -1.39  | 0.96   | -0.43  | -0.2  | -1.33 |
| <b>V109</b>  | -1.24 | -0.22 | -1.46 | 1.05   | 0.81   | 1.86   | -1.08  | -0.92  | -2     | -0.1  | -1.7  |
| <b>Y112</b>  | -2.56 | -0.13 | -2.69 | 1.47   | -1.62  | -0.15  | -0.72  | 1.69   | 0.97   | -0.17 | -2.04 |
| <b>L140</b>  | -1.75 | -0.17 | -1.92 | 1.2    | -2     | -0.81  | -1.15  | 2.39   | 1.24   | -0.23 | -1.72 |
| <b>S142</b>  | -1.87 | -0.94 | -2.81 | -0.27  | -6.08  | -6.35  | 0.51   | 6.75   | 7.25   | -0.45 | -2.36 |
| <b>N143</b>  | -1.1  | -0.61 | -1.71 | -7.72  | 1.15   | -6.56  | 7.11   | -0.19  | 6.92   | -0.23 | -1.58 |
| <b>P144</b>  | -1.8  | -0.55 | -2.34 | 16.94  | -24.19 | -7.25  | -16.46 | 23.03  | 6.57   | -0.31 | -3.33 |
| <b>V146</b>  | -1.74 | -0.27 | -2    | 1.38   | -3.6   | -2.22  | -1.31  | 3.76   | 2.45   | -0.26 | -2.04 |
| <b>R148</b>  | -0.65 | -0.03 | -0.68 | 26.39  | 11.13  | 37.52  | -27.94 | -10.88 | -38.81 | -0.25 | -2.22 |
| <b>V92A</b>  |       |       |       |        |        |        |        |        |        |       |       |
| <b>I1420</b> | -1.04 | -0.07 | -1.1  | -0.87  | 0.53   | -0.35  | 0.85   | -0.38  | 0.47   | -0.1  | -1.08 |
| <b>F1536</b> | -5.98 | -1.12 | -7.1  | -1.4   | -3.26  | -4.66  | 2.24   | 4.81   | 7.05   | -0.8  | -5.52 |
| <b>V1537</b> | -1.77 | -0.46 | -2.23 | -0.36  | 2.6    | 2.24   | 0.34   | -1.74  | -1.4   | -0.23 | -1.62 |
| <b>D1539</b> | 1.13  | -0.12 | 1     | -29.41 | 2.37   | -27.04 | 25.51  | -2.17  | 23.34  | -0.13 | -2.82 |
| <b>V6</b>    | -1.18 | -0.97 | -2.15 | 1.15   | -2.78  | -1.62  | -1.12  | 4.08   | 2.96   | -0.2  | -1.01 |
| <b>N7</b>    | -1.17 | -0.83 | -2    | 2.88   | -6.84  | -3.96  | -1.84  | 7.05   | 5.21   | -0.25 | -1    |
| <b>I31</b>   | -1.2  | -0.4  | -1.6  | 1.34   | -1.36  | -0.02  | -1.25  | 1.78   | 0.53   | -0.23 | -1.32 |
| <b>N143</b>  | -2.85 | -0.44 | -3.29 | -9.37  | 1.68   | -7.7   | 10.57  | -0.77  | 9.8    | -0.59 | -1.78 |
| <b>V146</b>  | -1.45 | -0.16 | -1.61 | 1.26   | -2.52  | -1.26  | -1.22  | 2.82   | 1.59   | -0.22 | -1.49 |

|              |       |       |       |        |       |       |        |        |        |       |       |
|--------------|-------|-------|-------|--------|-------|-------|--------|--------|--------|-------|-------|
| <b>R148</b>  | -0.76 | -0.05 | -0.8  | 26.38  | 12.01 | 38.39 | -30.67 | -11.7  | -42.36 | -0.46 | -5.24 |
| <b>Y112A</b> |       |       |       |        |       |       |        |        |        |       |       |
| <b>I1420</b> | -1.74 | -0.22 | -1.96 | -0.9   | 0.89  | -0.01 | 0.88   | -0.67  | 0.2    | -0.19 | -1.96 |
| <b>W1526</b> | -1.8  | -0.09 | -1.89 | -0.72  | -0.48 | -1.2  | 1.57   | 0.62   | 2.19   | -0.29 | -1.19 |
| <b>F1536</b> | -6.55 | -1.05 | -7.6  | -2.02  | -2.01 | -4.03 | 2.64   | 3.25   | 5.89   | -0.83 | -6.56 |
| <b>V1537</b> | -1.58 | -0.36 | -1.94 | -0.45  | 1.66  | 1.21  | 0.43   | -1.12  | -0.69  | -0.21 | -1.63 |
| <b>D1539</b> | 0.86  | -0.13 | 0.73  | -28.24 | 1.93  | -26.3 | 25.29  | -1.81  | 23.47  | -0.2  | -2.3  |
| <b>Y1589</b> | -0.87 | -0.03 | -0.9  | -7.21  | 0.37  | -6.84 | 5.37   | -0.35  | 5.02   | -0.29 | -3.01 |
| <b>N8</b>    | -1.48 | -0.72 | -2.2  | -3.46  | 1     | -2.46 | 4.8    | -1.35  | 3.45   | -0.18 | -1.39 |
| <b>V9</b>    | -0.78 | -0.79 | -1.56 | 1.08   | -3.96 | -2.88 | -1.12  | 4.48   | 3.37   | -0.08 | -1.15 |
| <b>S142</b>  | -1.59 | -1.19 | -2.77 | 1.35   | -7.93 | -6.58 | -0.16  | 8.98   | 8.81   | -0.42 | -0.96 |
| <b>N143</b>  | -2.1  | -0.7  | -2.8  | -7.87  | 1.47  | -6.39 | 8.12   | -0.88  | 7.23   | -0.34 | -2.29 |
| <b>P144</b>  | -2.2  | -0.63 | -2.82 | 16.51  | -20.6 | -4.09 | -16    | 20.28  | 4.28   | -0.31 | -2.95 |
| <b>V146</b>  | -1.3  | -0.21 | -1.51 | 1.23   | -3.54 | -2.31 | -1.17  | 3.84   | 2.67   | -0.24 | -1.4  |
| <b>R148</b>  | 0.33  | -0.03 | 0.3   | 22.8   | 11.86 | 34.66 | -28.18 | -11.58 | -39.77 | -0.31 | -5.12 |



**Table S3.** Hydrogen bonds between CIA/ASF1 and DBD for all systems at the binding site 1 in the last 20 ns. For every system, the cut-off used for hydrogen bond distance and angle is 3.5 Å and 120°, respectively. The percent hydrogen bond occupancy that hydrogen bonds formed during the MD simulations is produced by the CPPTRAJ module of AMBER14. In addition, each hydrogen bond distance is measured between the heavy atom of donor and the heavy atom of acceptor.

| #Acceptor     | DonorH        | Donor        | Occupancy | Distance (Å) |
|---------------|---------------|--------------|-----------|--------------|
| <b>WT</b>     |               |              |           |              |
| ASP_1539@OD1  | ARG_148@HH12  | ARG_148@NH1  | 0.3797    | 2.9068       |
| ASP_1539@OD2  | ARG_148@HH22  | ARG_148@NH2  | 0.3651    | 2.8988       |
| ASP_1539@OD2  | ARG_148@HH12  | ARG_148@NH1  | 0.3404    | 2.9145       |
| GLU_29@OE2    | TYR_1589@HH   | TYR_1589@OH  | 0.3376    | 2.7138       |
| ASP_1539@OD1  | ARG_148@HH22  | ARG_148@NH2  | 0.3374    | 2.9175       |
| PHE_1536@HZ   | VAL_9@HB      | VAL_9@CB     | 0.3223    | 3.3096       |
| GLU_29@OE1    | TYR_1589@HH   | TYR_1589@OH  | 0.2596    | 2.7162       |
| ASP_1539@CG   | ARG_148@HH12  | ARG_148@NH1  | 0.257     | 3.3652       |
| GLU_29@CD     | TYR_1589@HH   | TYR_1589@OH  | 0.2254    | 3.2955       |
| ILE_1420@O    | ASN_143@HD21  | ASN_143@ND2  | 0.221     | 2.9546       |
| ASP_1539@CG   | ARG_148@HH22  | ARG_148@NH2  | 0.2047    | 3.384        |
| <b>F1536A</b> |               |              |           |              |
| ASP_1416@OD2  | SER_47@HG     | SER_47@OG    | 0.7855    | 2.6271       |
| ASP_1416@OD1  | ASH_88@HD2    | ASH_88@OD2   | 0.7204    | 2.6179       |
| ASP_1416@OD2  | ALA_48@H      | ALA_48@N     | 0.6173    | 3.0352       |
| ASP_1416@CG   | ASH_88@HD2    | ASH_88@OD2   | 0.5943    | 3.1942       |
| TYR_1459@O    | ASN_114@HD22  | ASN_114@ND2  | 0.5896    | 2.9069       |
| GLU_116@OE2   | HIE_1464@HE2  | HIE_1464@NE2 | 0.4979    | 2.9558       |
| GLU_116@OE1   | HIE_1464@HE2  | HIE_1464@NE2 | 0.4879    | 2.9605       |
| GLU_49@H      | LYS_1419@HD3  | LYS_1419@CD  | 0.3823    | 3.2495       |
| GLU_116@CD    | HIE_1464@HE2  | HIE_1464@NE2 | 0.3039    | 3.3548       |
| ASP_1416@HB2  | VAL_92@H      | VAL_92@N     | 0.2273    | 3.1527       |
| ASN_114@HD22  | ASN_1458@HA   | ASN_1458@CA  | 0.2152    | 3.3152       |
| <b>Y1589A</b> |               |              |           |              |
| LYS_1535@O    | ARG_148@HH22  | ARG_148@NH2  | 0.4833    | 2.8629       |
| ILE_1420@O    | ASN_143@HD21  | ASN_143@ND2  | 0.3635    | 2.9587       |
| PHE_1536@HZ   | VAL_9@HB      | VAL_9@CB     | 0.3304    | 3.3111       |
| ASP_1539@OD1  | ARG_148@HH22  | ARG_148@NH2  | 0.2138    | 2.911        |
| ASP_1539@OD2  | ARG_148@HH12  | ARG_148@NH1  | 0.2085    | 2.8811       |
| ASP_1539@OD2  | ARG_148@HH22  | ARG_148@NH2  | 0.1881    | 2.9168       |
| ASP_1539@OD1  | ARG_148@HH12  | ARG_148@NH1  | 0.1821    | 2.9134       |
| <b>H1610A</b> |               |              |           |              |
| ASN_7@O       | ASN_1533@H    | ASN_1533@N   | 0.5701    | 3.0806       |
| ASP_1539@OD2  | ARG_148@HH12  | ARG_148@NH1  | 0.5279    | 2.8989       |
| ASP_1539@OD2  | ARG_148@HH22  | ARG_148@NH2  | 0.5199    | 2.9152       |
| ASP_1539@OD1  | ARG_148@HH22  | ARG_148@NH2  | 0.5166    | 2.894        |
| ASP_1539@OD1  | ARG_148@HH12  | ARG_148@NH1  | 0.5074    | 2.899        |
| PHE_1536@HZ   | VAL_9@HB      | VAL_9@CB     | 0.4396    | 3.2814       |
| ILE_1420@O    | ASN_143@HD21  | ASN_143@ND2  | 0.3966    | 2.9578       |
| ASN_8@OD1     | ASN_1533@HD21 | ASN_1533@ND2 | 0.3916    | 2.9372       |
| ASP_1539@CG   | ARG_148@HH12  | ARG_148@NH1  | 0.3428    | 3.38         |
| ASP_1539@CG   | ARG_148@HH22  | ARG_148@NH2  | 0.3253    | 3.387        |

**F1509A**

|                      |               |              |        |        |
|----------------------|---------------|--------------|--------|--------|
| <b>ASN_7@O</b>       | ASN_1533@H    | ASN_1533@N   | 0.6995 | 3.0705 |
| <b>ASN_8@OD1</b>     | ASN_1533@HD21 | ASN_1533@ND2 | 0.4933 | 2.9258 |
| <b>ASP_1539@OD2</b>  | ARG_148@HH22  | ARG_148@NH2  | 0.4547 | 2.8855 |
| <b>ASP_1539@OD1</b>  | ARG_148@HH12  | ARG_148@NH1  | 0.4492 | 2.9022 |
| <b>ASP_1539@OD2</b>  | ARG_148@HH12  | ARG_148@NH1  | 0.446  | 2.9018 |
| <b>ASP_1539@OD1</b>  | ARG_148@HH22  | ARG_148@NH2  | 0.4405 | 2.8953 |
| <b>THR_1422@OG1</b>  | SER_142@HG    | SER_142@OG   | 0.4368 | 2.7813 |
| <b>PHE_1536@HZ</b>   | VAL_9@HB      | VAL_9@CB     | 0.4002 | 3.2966 |
| <b>ASN_114@HB2</b>   | ILE_1420@HG12 | ILE_1420@CG1 | 0.3028 | 3.299  |
| <b>ASP_1539@CG</b>   | ARG_148@HH12  | ARG_148@NH1  | 0.2965 | 3.3794 |
| <b>THR_1422@HG1</b>  | SER_142@HG    | SER_142@OG   | 0.2883 | 3.3008 |
| <b>ASP_1539@CG</b>   | ARG_148@HH22  | ARG_148@NH2  | 0.2567 | 3.388  |
| <b>ILE_1420@HG12</b> | ASN_114@HB2   | ASN_114@CB   | 0.2097 | 3.2636 |
| <b>GLU_29@OE2</b>    | TYR_1589@HH   | TYR_1589@OH  | 0.2077 | 2.7471 |
| <b>GLU_29@CD</b>     | TYR_1589@HH   | TYR_1589@OH  | 0.205  | 3.2722 |

**Y1607A**

|                     |              |             |        |        |
|---------------------|--------------|-------------|--------|--------|
| <b>ASP_1539@OD1</b> | ARG_148@HH12 | ARG_148@NH1 | 0.5185 | 2.8836 |
| <b>ASP_1539@OD2</b> | ARG_148@HH22 | ARG_148@NH2 | 0.5095 | 2.8983 |
| <b>ASP_1539@OD1</b> | ARG_148@HH22 | ARG_148@NH2 | 0.5072 | 2.9039 |
| <b>ASP_1539@OD2</b> | ARG_148@HH12 | ARG_148@NH1 | 0.484  | 2.8955 |
| <b>ILE_1420@O</b>   | ASN_143@HD21 | ASN_143@ND2 | 0.4522 | 2.9127 |
| <b>ASP_1539@CG</b>  | ARG_148@HH12 | ARG_148@NH1 | 0.3857 | 3.3607 |
| <b>ASP_1539@CG</b>  | ARG_148@HH22 | ARG_148@NH2 | 0.3553 | 3.3772 |
| <b>GLU_29@OE2</b>   | TYR_1589@HH  | TYR_1589@OH | 0.3445 | 2.7111 |
| <b>PHE_1536@HZ</b>  | VAL_9@HB     | VAL_9@CB    | 0.3407 | 3.3045 |
| <b>GLU_29@OE1</b>   | TYR_1589@HH  | TYR_1589@OH | 0.2742 | 2.708  |
| <b>TYR_1582@OH</b>  | GLN_5@HE22   | GLN_5@NE2   | 0.267  | 3.1446 |
| <b>GLU_29@CD</b>    | TYR_1589@HH  | TYR_1589@OH | 0.2482 | 3.3292 |

**Y112A**

|                   |              |              |        |        |
|-------------------|--------------|--------------|--------|--------|
| <b>ASN_7@O</b>    | ASN_1533@H   | ASN_1533@N   | 0.9067 | 3.0208 |
| <b>PRO_1531@O</b> | ASN_8@HD21   | ASN_8@ND2    | 0.8063 | 2.9184 |
| <b>VAL_9@H</b>    | PHE_1536@HE1 | PHE_1536@CE1 | 0.246  | 3.2893 |
| <b>TYR_1418@O</b> | SER_142@HG   | SER_142@OG   | 0.2172 | 2.7232 |

**V10A**

|                     |              |              |        |        |
|---------------------|--------------|--------------|--------|--------|
| <b>ASN_7@O</b>      | ASN_1533@H   | ASN_1533@N   | 0.9067 | 3.0208 |
| <b>PRO_1531@O</b>   | ASN_8@HD21   | ASN_8@ND2    | 0.8063 | 2.9184 |
| <b>VAL_9@H</b>      | PHE_1536@HE1 | PHE_1536@CE1 | 0.246  | 3.2893 |
| <b>TYR_1418@O</b>   | SER_142@HG   | SER_142@OG   | 0.2172 | 2.7232 |
| <b>LEU_140@HD13</b> | ILE_1420@HA  | ILE_1420@CA  | 0.1915 | 3.2379 |
| <b>LEU_140@HD12</b> | ILE_1420@HA  | ILE_1420@CA  | 0.1905 | 3.2397 |

**V92A**

|                     |               |              |        |        |
|---------------------|---------------|--------------|--------|--------|
| <b>ASP_1539@OD1</b> | ARG_148@HH22  | ARG_148@NH2  | 0.5697 | 2.8826 |
| <b>ASP_1539@OD2</b> | ARG_148@HH12  | ARG_148@NH1  | 0.5685 | 2.8838 |
| <b>ASP_1539@OD1</b> | ARG_148@HH12  | ARG_148@NH1  | 0.5282 | 2.8937 |
| <b>ASP_1539@OD2</b> | ARG_148@HH22  | ARG_148@NH2  | 0.5157 | 2.8908 |
| <b>ASN_7@O</b>      | ASN_1533@HD21 | ASN_1533@ND2 | 0.511  | 2.899  |
| <b>ASP_1539@CG</b>  | ARG_148@HH12  | ARG_148@NH1  | 0.447  | 3.361  |
| <b>ASP_1539@CG</b>  | ARG_148@HH22  | ARG_148@NH2  | 0.3832 | 3.3746 |

|                     |              |             |        |        |
|---------------------|--------------|-------------|--------|--------|
| <b>ILE_31@O</b>     | TYR_1589@HH  | TYR_1589@OH | 0.2774 | 2.8145 |
| <b>PHE_1536@HB3</b> | VAL_6@HB     | VAL_6@CB    | 0.2237 | 3.3259 |
| <b>V94A</b>         |              |             |        |        |
| <b>ASP_1539@OD2</b> | ARG_148@HH12 | ARG_148@NH1 | 0.4406 | 2.8998 |
| <b>ASP_1539@OD1</b> | ARG_148@HH22 | ARG_148@NH2 | 0.4358 | 2.9061 |
| <b>ASP_1539@OD2</b> | ARG_148@HH22 | ARG_148@NH2 | 0.4173 | 2.9093 |
| <b>ASP_1539@OD1</b> | ARG_148@HH12 | ARG_148@NH1 | 0.4104 | 2.9008 |
| <b>PHE_1536@HZ</b>  | VAL_9@HB     | VAL_9@CB    | 0.3787 | 3.3133 |
| <b>ASP_1539@CG</b>  | ARG_148@HH12 | ARG_148@NH1 | 0.3133 | 3.3763 |
| <b>ASP_1539@CG</b>  | ARG_148@HH22 | ARG_148@NH2 | 0.2708 | 3.3817 |
| <b>ILE_1420@O</b>   | ASN_143@HD21 | ASN_143@ND2 | 0.246  | 2.9383 |
